## ASME Freeman Scholar

The 19th ASME Freeman Scholar committee is soliciting proposals for a person of high capability and considerable experience in an area of fluids engineering to be selected as the Freeman Scholar. He/she will be expected to make a major review of a coherent topic in his/her specialty, prepare a comprehensive statement of the state of the field, and suggest key research needs for the future. After suitable review, the results will be presented publicly at the ASME Fluids Engineering Division conference, and published in the ASME *Journal of Fluids Engineering*.

The honorarium for preparing the review, producing a manuscript in a form for publication and presenting the results at the Congress is \$7,500. There will be an additional allowance to cover the cost of travel to present the paper in 2008. The Scholar shall be available, as far as personal commitments permit, for presentation of the lecture at sites of fluids engineering activity in industry, government, or education that so request. In each case, the inviting institution will be expected to bear all expenses and, if necessary, to provide a reasonable honorarium.

Applications for the 2008 Scholarship are to be submitted by **September 1, 2007**. The application shall include:

- (1) The applicant's qualifications for undertaking a major study in the field selected.
- (2) A statement of the basis for believing that a summary of the state of the art on the proposed topic will make a significant and timely contribution to current or future real problems in fluids engineering practice.
- (3) A description of the ideas to be considered and some of the technology to be reviewed.

The Freeman Scholar Program is supported by the ASME Freeman Fund established in 1926 by John R. Freeman, noted Hydraulic Engineer and Scholar, Honorary Member and Twenty-fourth President of ASME. Mr. Freeman suggested a flexible program for utilization of the funds. In early years, it supported fellowships for the study of hydraulic laboratory practice in Europe, later it supported publication of important hydraulic research data, and more recently it was granted to support research programs in hydraulics and fluid mechanics. The Freeman Scholar Program in fluids engineering represents a timely usage of the Fund and is consistent with the intentions of the donor.

For full details, see the Freeman Scholar Program website at  
[http://www.asme.org/Governance/Honors/SocietyAwards/18th\\_Freeman\\_Scholar\\_Program.cfm](http://www.asme.org/Governance/Honors/SocietyAwards/18th_Freeman_Scholar_Program.cfm).

**Timothy O'Hearn**  
**Sandia National Laboratories**  
**Chair, 19th Freeman Scholar**
